# Supplementary material for: A Comparison of the Australian Dietary Guidelines to the NOVA Classification System in Classifying Foods to Predict Energy Intakes and Body Mass Index
Source: MDPI journal article supplement (doi:10.3390/nu14193942), 2022-09-23

**Supplementary Table S1:** Proportion of energy from all foods reported in the National Nutrition and Physical Activity Survey classified by the NOVA classification system and the Australian Dietary Guidelines

| <i>Minor food groups</i>                                                                    | <i>NOVA classification</i> |           |           |           |            | <i>ADG</i> |           |
|---------------------------------------------------------------------------------------------|----------------------------|-----------|-----------|-----------|------------|------------|-----------|
|                                                                                             | <b>Energy (%)</b>          | <b>MP</b> | <b>CI</b> | <b>PF</b> | <b>UPF</b> | <b>FFG</b> | <b>DF</b> |
| <b><i>Total</i></b>                                                                         | <b>100</b>                 | 37.2      | 7.1       | 15.5      | 40.4       | 63.6       | 36.5      |
| <i>Regular breads, and bread rolls</i>                                                      | <b>9.5</b>                 | 0         | 0         | 64.6      | 35.4       | 100        | 0         |
| <i>Breakfast cereals</i>                                                                    | <b>3.7</b>                 | 15.1      | 0         | 0         | 84.9       | 96         | 4         |
| <i>Mixed dishes where cereal is the major ingredient<sup>1</sup></i>                        | <b>2.3</b>                 | 0         | 0         | 0         | 100        | 80         | 20        |
| <i>Margarine, table spreads and dairy blends</i>                                            | <b>1.1</b>                 | 0         | 0         | 0         | 100        | 76         | 24        |
| <i>Fruit and vegetable juices, and drinks</i>                                               | <b>1.7</b>                 | 6.2       | 0         | 0         | 93.8       | 55         | 45        |
| <i>Yoghurt</i>                                                                              | <b>1.1</b>                 | 27        | 0         | 0         | 73         | 100        | 0         |
| <i>Flavoured milks and milkshakes</i>                                                       | <b>0.6</b>                 | 0         | 0         | 0         | 100        | 100        | 0         |
| <i>Pasta and pasta products (without sauce)</i>                                             | <b>2.8</b>                 | 78.9      | 0         | 0         | 21.1       | 100        | 0         |
| <i>Savoury biscuits</i>                                                                     | <b>1.1</b>                 | 0         | 0         | 0         | 100        | 53         | 47        |
| <i>Mixed dishes, predominantly poultry, beef, sheep, pork or mammalian game<sup>2</sup></i> | <b>1.1</b>                 | 27.2      | 0         | 0         | 72.8       | 69         | 31        |
| <i>English-style muffins, flat breads, and savoury and sweet breads</i>                     | <b>1.4</b>                 | 0         | 0         | 42.3      | 57.7       | 78         | 22        |
| <i>Cheese</i>                                                                               | <b>3.1</b>                 | 0         | 0         | 87.7      | 12.3       | 100        | 0         |
| <i>Meat and dairy substitutes</i>                                                           | <b>0.4</b>                 | 0         | 0         | 0         | 100        | 97         | 3         |
| <i>Cordials, electrolyte, energy, fortified drinks and beverage flavourings</i>             | <b>1.4</b>                 | 0         | 0         | 0         | 100        | 18         | 82        |
| <i>Batter-based products<sup>3</sup></i>                                                    | <b>0.4</b>                 | 0         | 0         | 0         | 100        | 47         | 53        |
| <i>Dietary and infant foods, intense sweeteners, cooking aids, extracts, essences</i>       | <b>0.4</b>                 | 0         | 0.5       | 0         | 99.5       | 40         | 60        |

|                                                                                          |            |      |     |      |      |     |     |
|------------------------------------------------------------------------------------------|------------|------|-----|------|------|-----|-----|
| <i>Other vegetables and legumes</i>                                                      | <b>3.5</b> | 86.4 | 0   | 8.8  | 4.8  | 100 | 0   |
| <i>Custards</i>                                                                          | <b>0.1</b> | 0    | 0   | 0    | 100  | 100 | 0   |
| <i>Packaged soups, sauces, pickles, gravies, stocks, dips, salad dressings and herbs</i> | <b>2</b>   | 1.9  | 1.1 | 4    | 92.9 | 14  | 86  |
| <i>Cakes, muffins, scones, cake-type desserts</i>                                        | <b>2</b>   | 0    | 0   | 0    | 100  | 4   | 96  |
| <i>Nuts, seeds and nuts and seed products</i>                                            | <b>1.9</b> | 58.8 | 0   | 38.7 | 2.5  | 100 | 0   |
| <i>Potatoes</i>                                                                          | <b>2.8</b> | 44.9 | 0   | 0    | 55.1 | 46  | 54  |
| <i>Flours and other cereal grains and starches</i>                                       | <b>4.8</b> | 99.6 | 0   | 0    | 0.4  | 100 | 0   |
| <i>Beef, sheep, pork, mammalian meat and offal unprocessed</i>                           | <b>4.9</b> | 99.8 | 0   | 0    | 0.2  | 100 | 0   |
| <i>Tea, coffee, coffee substitutes</i>                                                   | <b>0.4</b> | 71.2 | 0   | 0    | 28.8 | 73  | 27  |
| <i>Dairy milk (cow, sheep and goat)</i>                                                  | <b>6.3</b> | 99.4 | 0   | 0.6  | 0    | 100 | 0   |
| <i>Fruit</i>                                                                             | <b>4.6</b> | 96.7 | 0   | 3.3  | 0    | 100 | 0   |
| <i>Poultry and feathered game</i>                                                        | <b>3.5</b> | 100  | 0   | 0    | 0    | 100 | 0   |
| <i>Pastries</i>                                                                          | <b>2.3</b> | 0    | 0   | 0    | 100  | 0   | 100 |
| <i>Soft drinks, and flavoured mineral waters</i>                                         | <b>2.1</b> | 0    | 0   | 0    | 100  | 0   | 100 |
| <i>Chocolate and chocolate-based confectionery</i>                                       | <b>1.8</b> | 0    | 0   | 0    | 100  | 0   | 100 |
| <i>Frozen milk products and other milk-based desserts</i>                                | <b>1.8</b> | 0    | 0   | 0    | 100  | 0   | 100 |
| <i>Sweet biscuits</i>                                                                    | <b>1.7</b> | 0    | 0   | 0    | 100  | 0   | 100 |
| <i>Plant oils</i>                                                                        | <b>1.5</b> | 0    | 100 | 0    | 0    | 100 | 0   |
| <i>Potato, corn, extruded, reformed and other savoury snacks</i>                         | <b>1.5</b> | 1    | 0   | 0    | 99   | 1   | 99  |
| <i>Eggs</i>                                                                              | <b>1.1</b> | 100  | 0   | 0    | 0    | 100 | 0   |
| <i>Confectionary, sweet sauces and spreads and other sugar-based dishes</i>              | <b>0.7</b> | 0    | 0   | 0    | 100  | 0   | 100 |
| <i>Muesli or cereal style, fruit, nut and seed-bars</i>                                  | <b>0.6</b> | 0    | 0   | 0    | 100  | 0   | 100 |

|                                              |            |      |      |      |      |    |     |
|----------------------------------------------|------------|------|------|------|------|----|-----|
| <i>Spirits and other alcoholic beverages</i> | <b>0.6</b> | 0    | 0    | 0    | 100  | 0  | 100 |
| <i>Fish and seafood</i>                      | <b>1.8</b> | 58.3 | 0    | 28.8 | 12.9 | 83 | 17  |
| <i>Cider and perry</i>                       | <b>0.1</b> | 0    | 0    | 100  | 0    | 0  | 100 |
| <i>Butter and Cream</i>                      | <b>1.4</b> | 0    | 98.8 | 0    | 1.2  | 0  | 100 |
| <i>Processed meats and sausages</i>          | <b>3.0</b> | 0    | 0    | 48.1 | 51.9 | 3  | 97  |
| <i>Beers</i>                                 | <b>1.9</b> | 0    | 0    | 100  | 0    | 0  | 100 |
| <i>Sugar, honey and syrups</i>               | <b>2.3</b> | 12.4 | 79.6 | 0    | 8.1  | 0  | 100 |
| <i>Wines</i>                                 | <b>2.2</b> | 0    | 0    | 100  | 0    | 0  | 100 |
| <i>Unspecified fats</i>                      | <b>2.5</b> | 0    | 91.3 | 0    | 8.7  | 0  | 100 |

1. *Pizza, sandwiches, kebabs, hot dogs, burgers, tacos, tortilla dishes, pasta and rice dishes, savoury dumplings and sushi*
2. *Casseroles, curries, and stir-fries*
3. *Pancakes, scones, waffles, donuts and crumpets*

Figure S1: Participant flow diagram from the National Nutrition and Physical Activity Survey

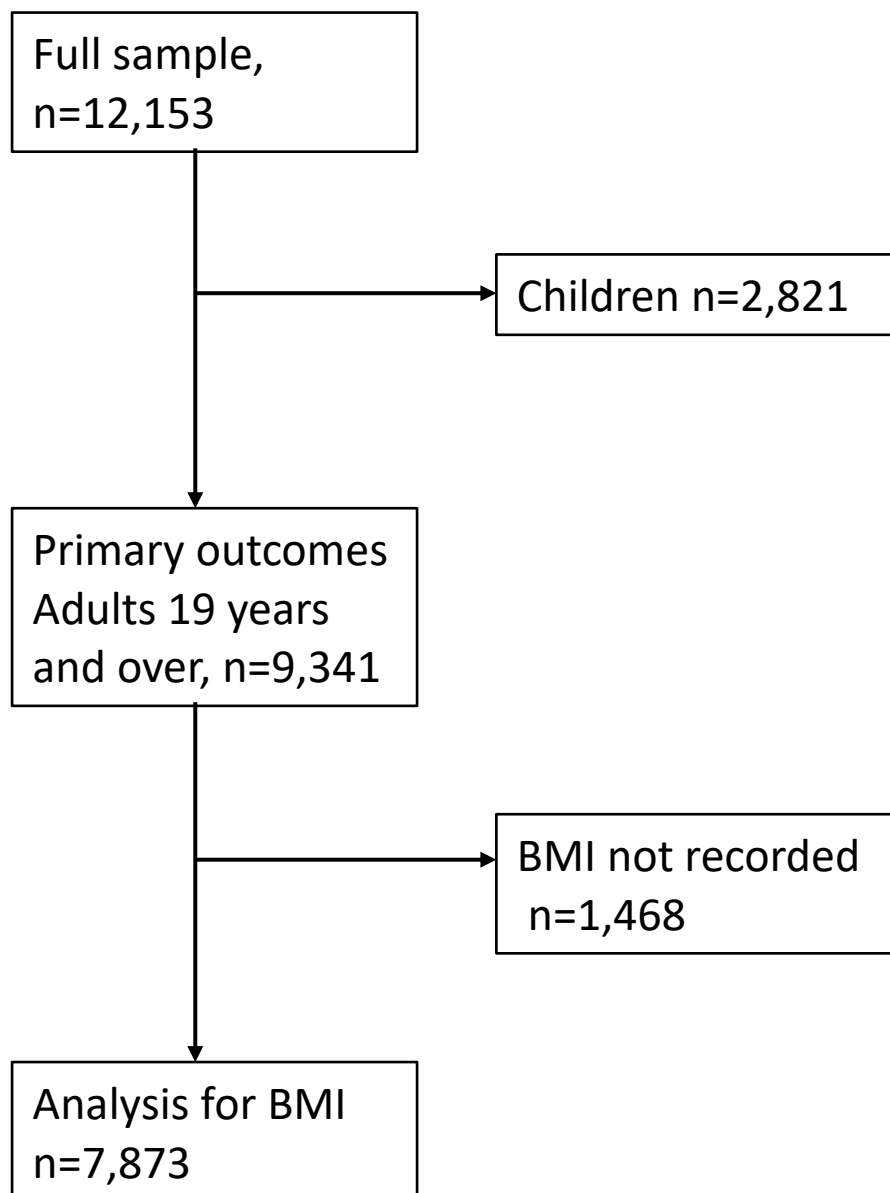

Supplement: s1 [file s1]
